# Supplementary material
Source: PubMed Central journal article supplement (PMC1100735)
Supplement: pnas_102_19_6813__1.pdf [file pnas_102_19_6813__1.pdf]

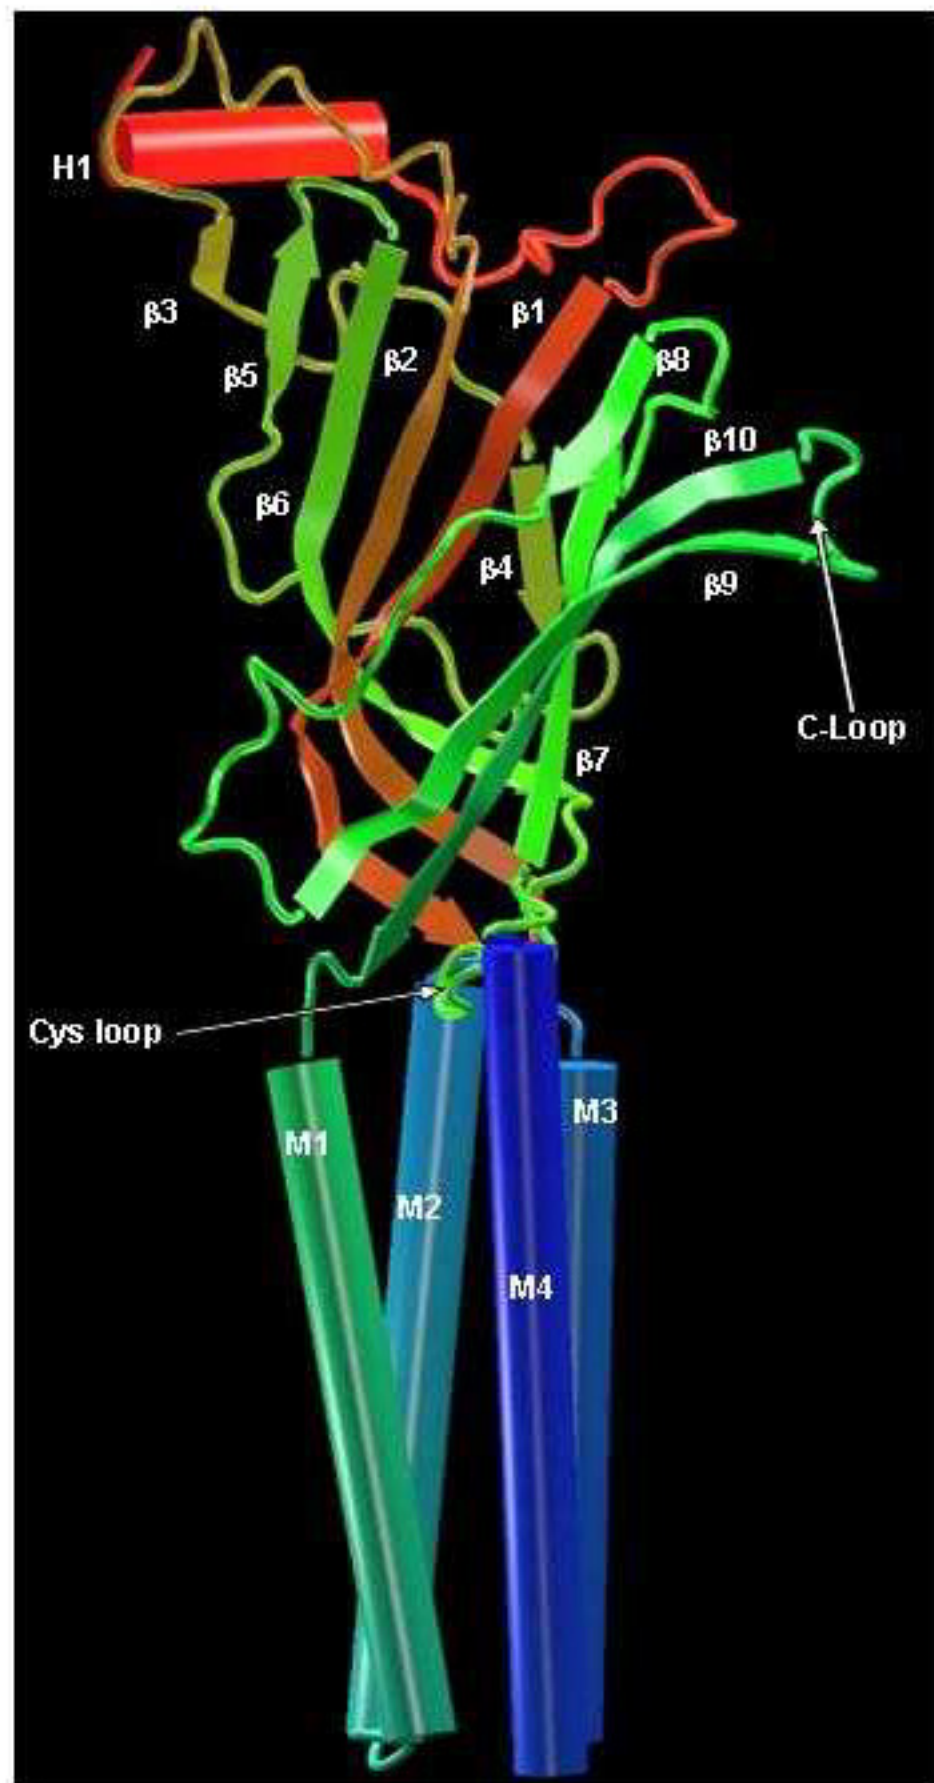

|     |                      |                 |             |                  |                |           |                         |
|-----|----------------------|-----------------|-------------|------------------|----------------|-----------|-------------------------|
|     | 10                   | 20              | 30          | 40               | 50             | 60        |                         |
|     | MRCSPGGVWLALAASLLHVS | LQG             | EF          | QRRLYKELVET      | YNPLERPVANDSQP | LTVYFSL   | LLQIMDVDEKN             |
|     |                      |                 | <b>H1</b>   |                  |                | <b>β1</b> |                         |
| 70  | 80                   | 90              | 100         | 110              | 120            | 130       |                         |
|     | QVLT                 | TNIWLQMSWT      | DHYLQWNVSEY | PGVK             | TVREF          | PDGQIWK   | PDILLYNSADERFDATEHT     |
|     |                      | <b>β2</b>       |             | <b>β3</b>        |                | <b>β4</b> | <b>β5</b>               |
| 140 | 150                  | 160             | 170         | 180              | 190            | 200       |                         |
|     | YLPPGIFKSSG          | YIDVRWF         | FDVQ        | HCKLKEGSM        | SYGGW          | SLDLQM    | QEADISGYIPNGEWDLVGLPGKR |
|     | <b>β6</b>            | <b>Cys loop</b> |             | <b>β7</b>        |                | <b>β8</b> | <b>β9</b>               |
| 210 | 220                  | 230             | 240         | 250              | 260            | 270       |                         |
|     | YECCKE               | PY              | PDVTF       | TVTMRRRT         | LYYGLNLLI      | PCVLI     | SALALLV                 |
|     | <b>C-loop</b>        |                 | <b>β10</b>  |                  | <b>M1</b>      |           | <b>M2</b>               |
| 280 | 290                  | 300             | 310         | 320              | 330            | 340       |                         |
|     | AEIMPAT              | SDSVPLIAQ       | YFASTMI     | IVGLSVV          | TVIVLQY        | HHHD      | PDGGKMPKWT              |
|     |                      |                 | <b>M3</b>   |                  |                |           | RVILLNWCAMFLRMKRP       |
| 350 | 360                  | 370             | 380         | 390              | 400            | 410       |                         |
|     | GEDKVR               | PACQHKQ         | RRC         | SLASVEMS         | AVAPPPAS       | NGNLLYI   | GFRGLDGVHCVPT           |
|     |                      |                 |             | <b>Vestibule</b> |                |           | PDSGVVCGRMACSPTHDE      |
| 420 | 430                  | 440             | 450         | 460              | 470            | 480       |                         |
|     | HLLHGG               | QPPEG           | DPDLAKI     | LEEVRY           | IANRFR         | CQDESE    | AVCSEWKEFA              |
|     |                      |                 |             |                  |                |           | <b>M4</b>               |
| 490 | MSAPNF               | VEAVS           |             |                  |                |           |                         |
|     |                      |                 |             |                  |                |           | KDFA                    |
