# Supplementary material
Source: PubMed Central journal article supplement (PMC1100735)

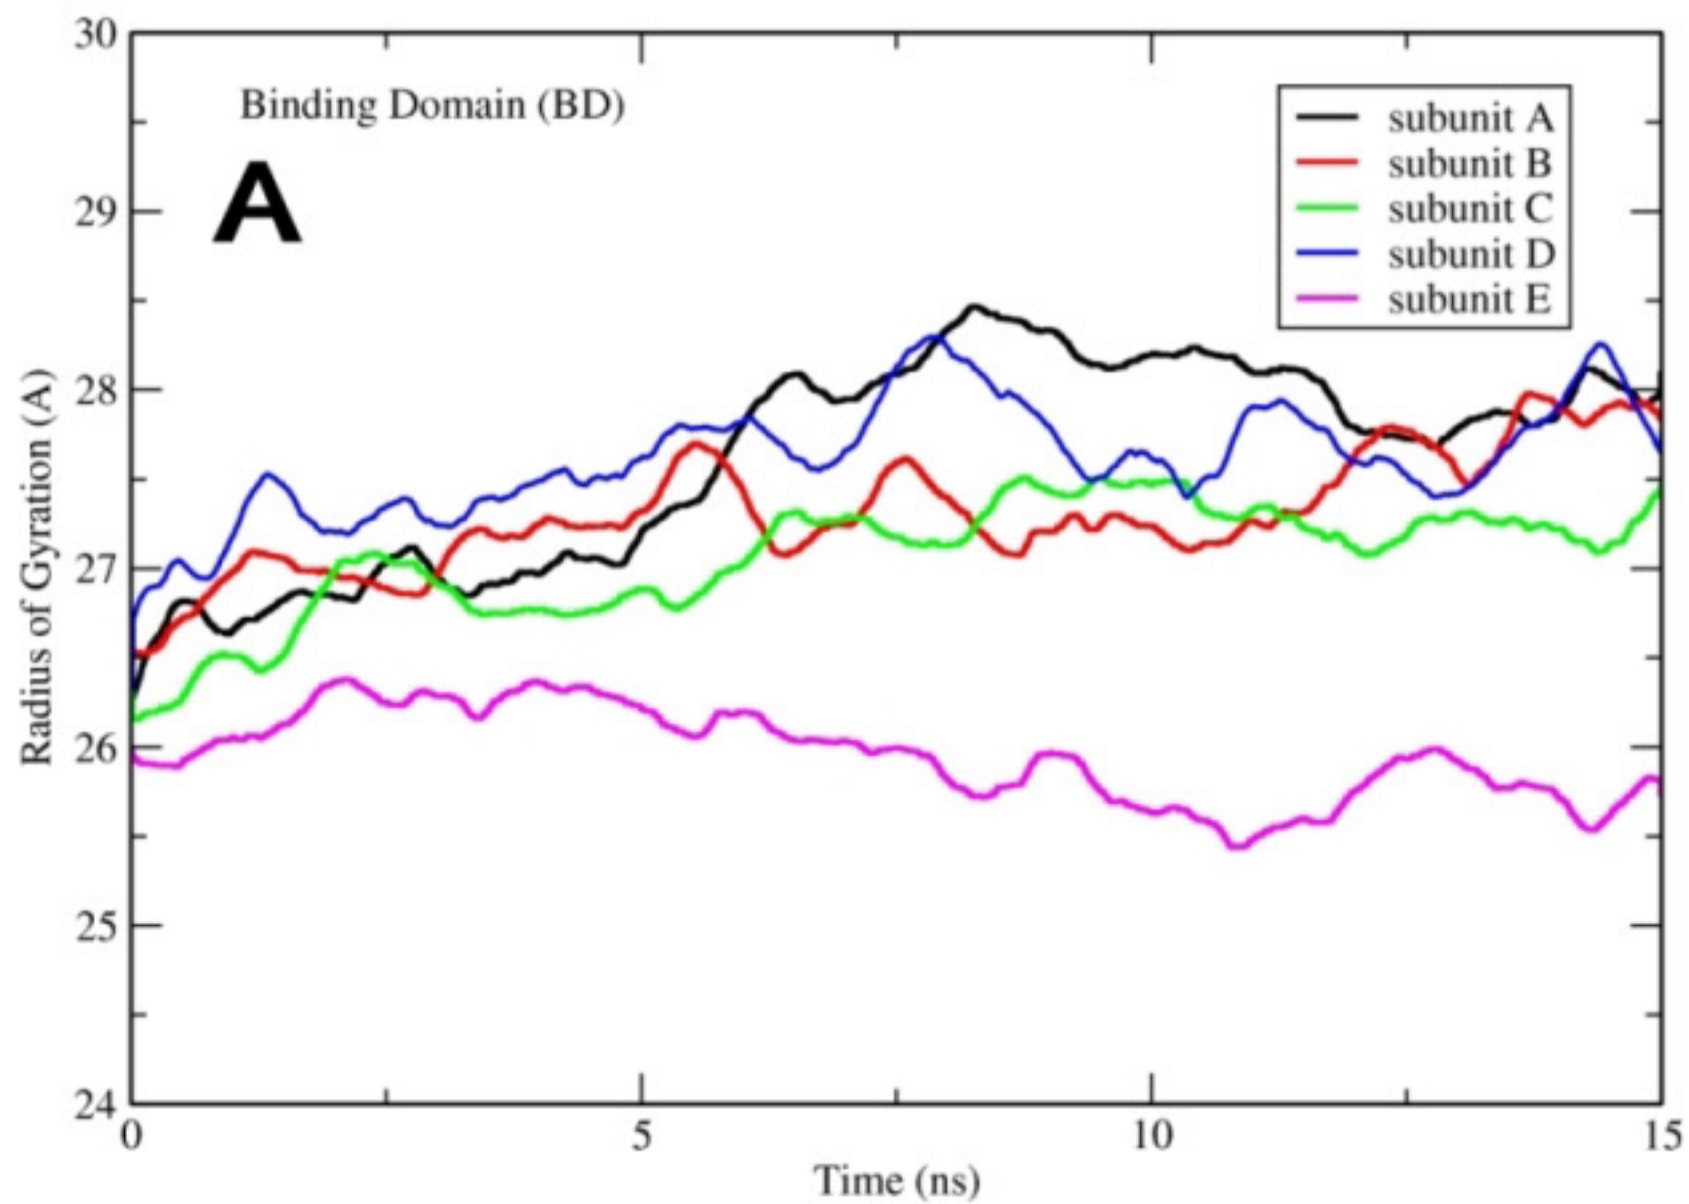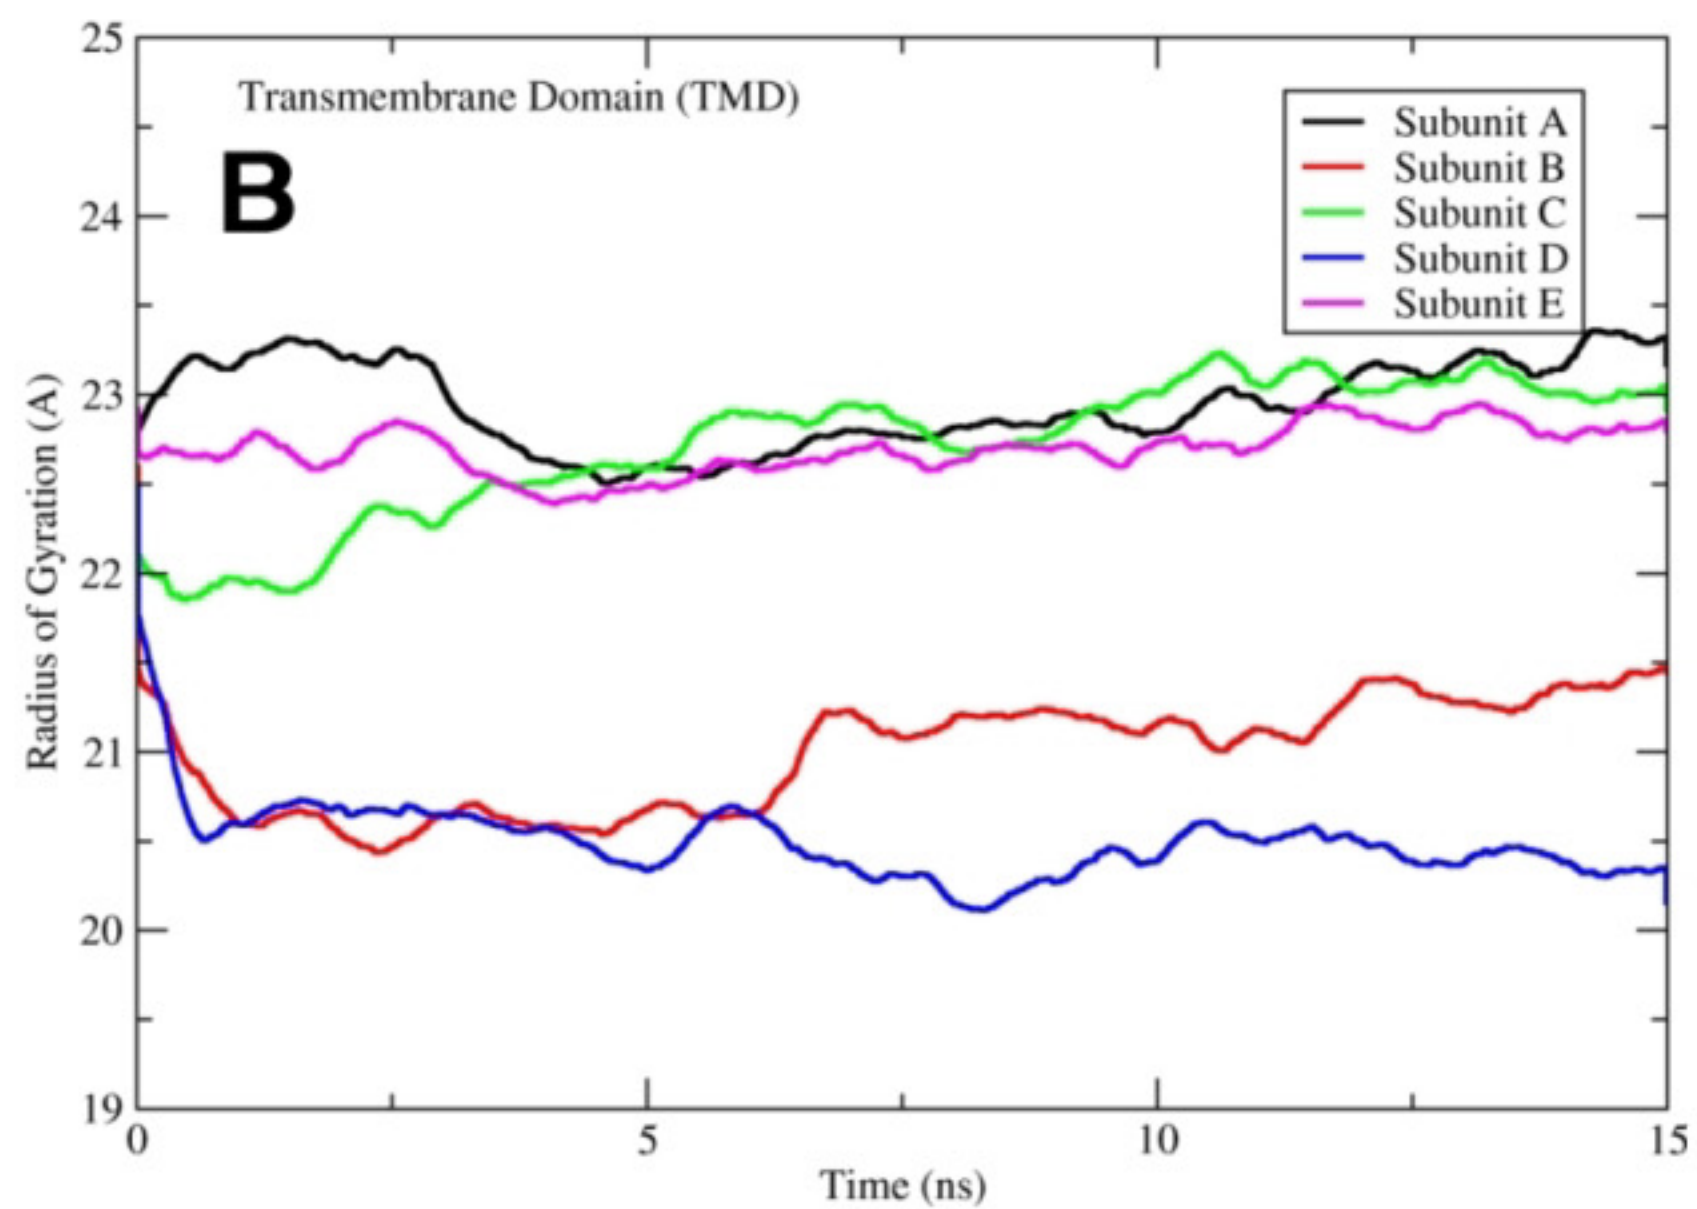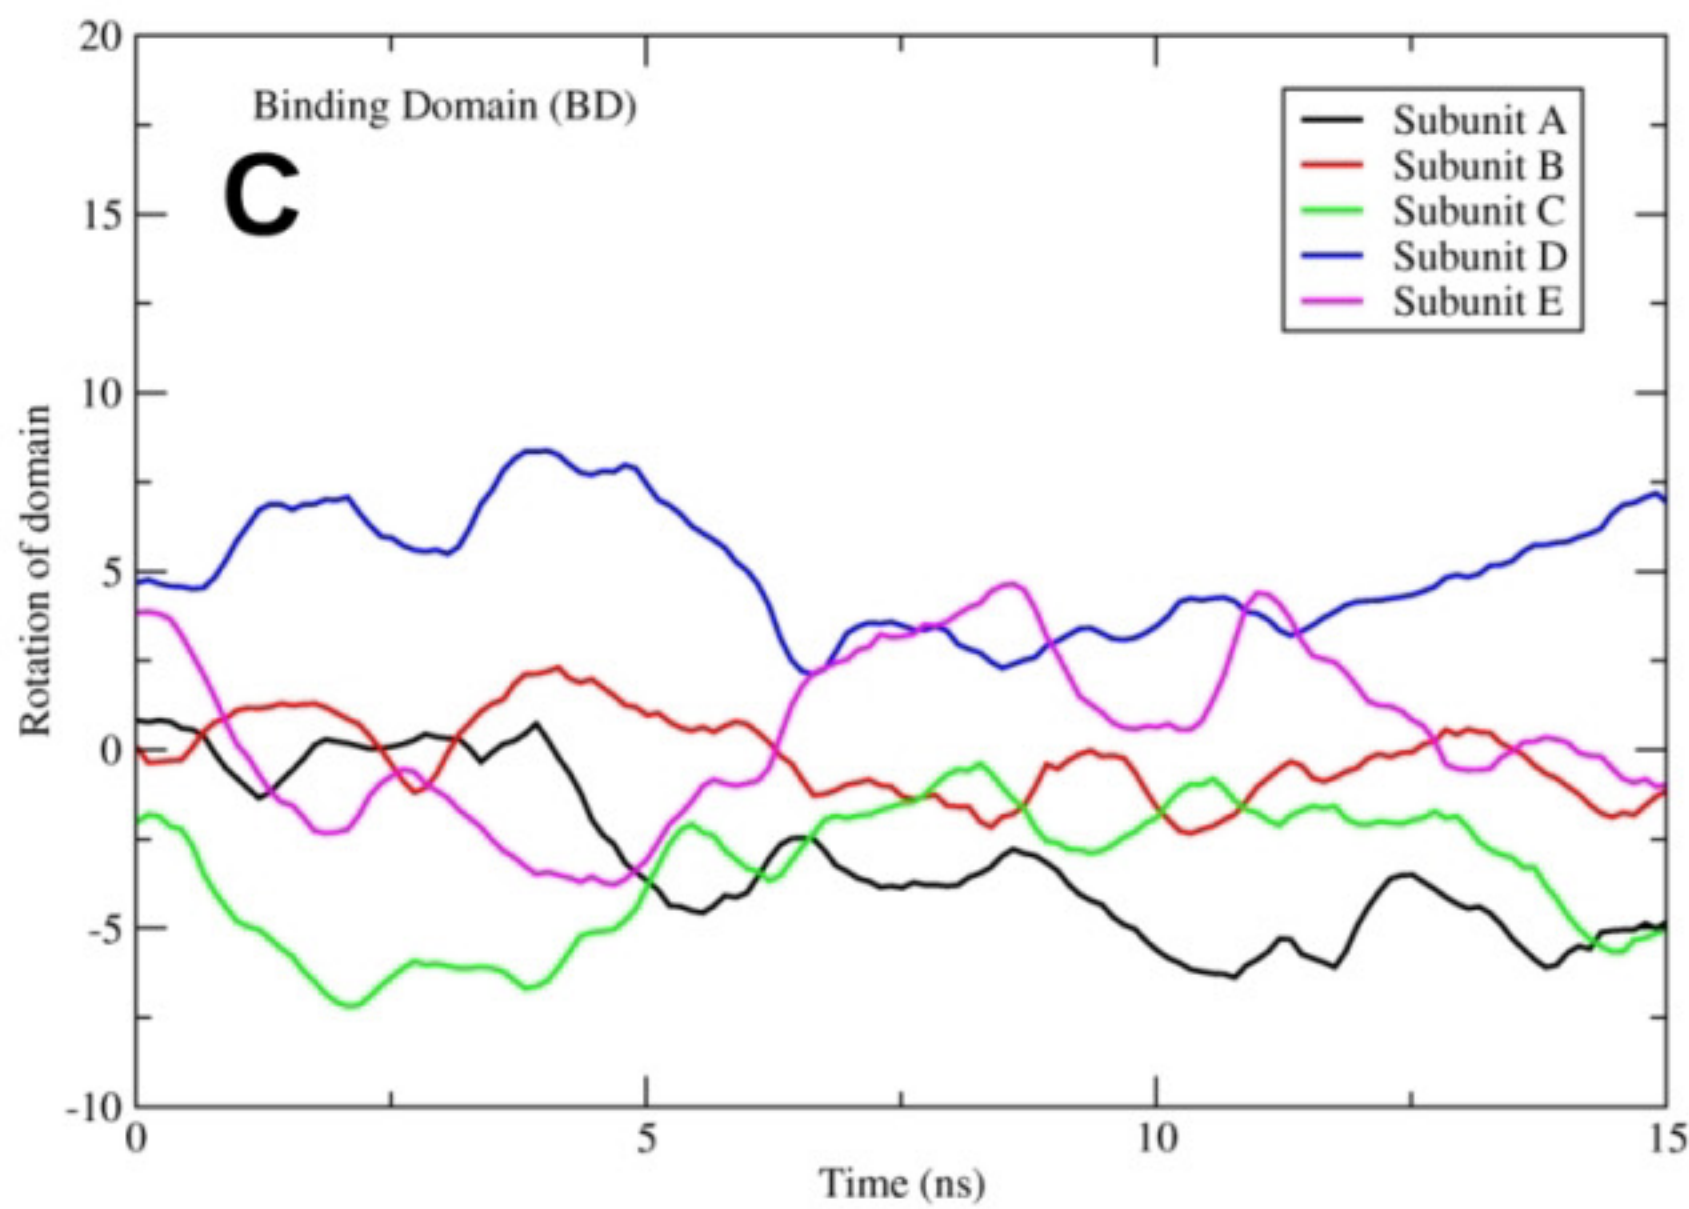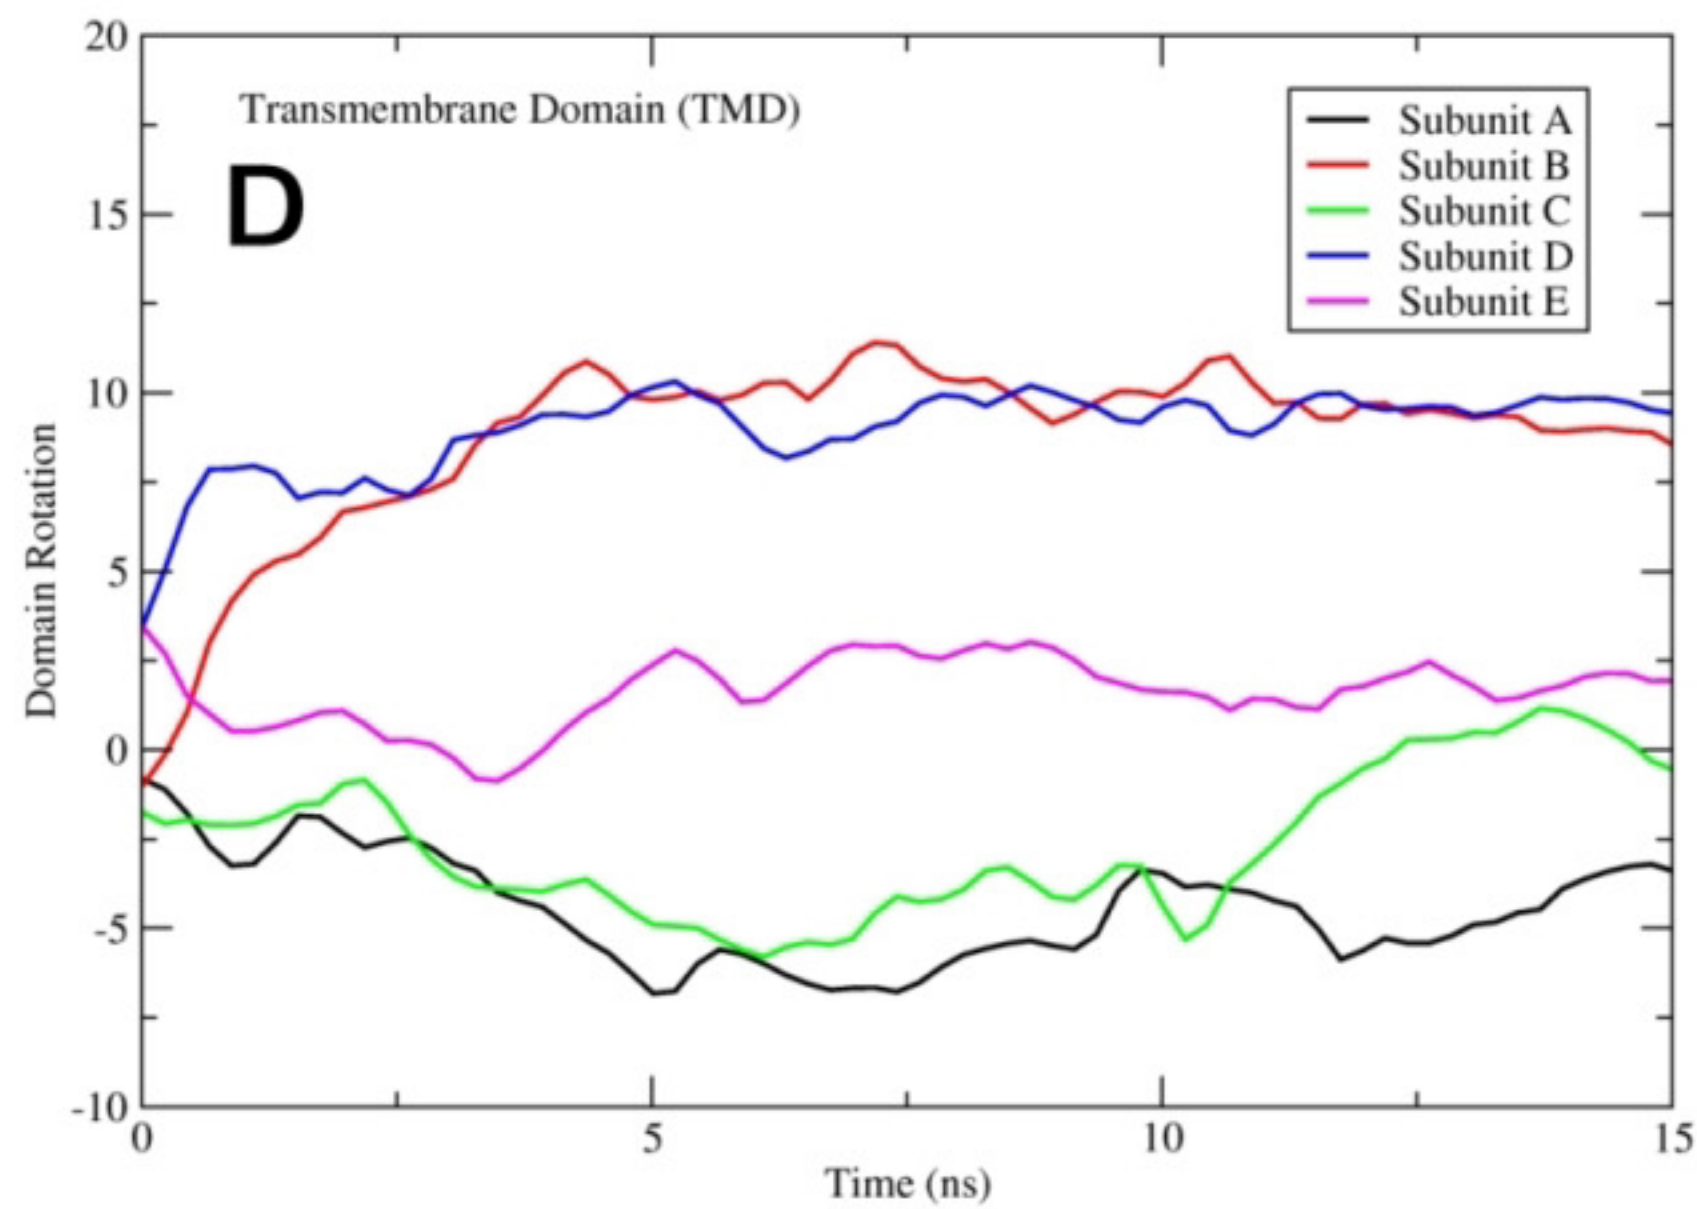

Supplement: pnas_102_19_6813__2.pdf [file pnas_102_19_6813__2.pdf]
